# Supplementary material for: Chitosan-Based Nanofibrous Membrane Unit with Gradient Compositional and Structural Features for Mimicking Calcified Layer in Osteochondral Matrix
Source: PubMed Central journal article supplement (PMC6121876; doi:10.3390/ijms19082330), 2018-08-08
Supplement: ijms-19-02330-s001.pdf [file ijms-19-02330-s001.pdf]

Supporting information

# Layered scaffolds incorporated with compositional gradient nanofibrous membranes for mimicking the calcified layer in osteochondral matrix

Jiaoyan Liu<sup>1</sup>, Qing fang<sup>1</sup>, Xiaofeng Yu<sup>1</sup>, Ying Wan<sup>1,\*</sup>, Bo Xiao<sup>2,\*</sup>

<sup>1</sup> College of Life Science and Technology, Huazhong University of Science and Technology, Wuhan 430074, P. R. China

<sup>2</sup> Institute for Clean Energy and Advanced Materials, Faculty for Materials and Energy, Southwest University, Chongqing 400715, P. R. China

\*Corresponding authors: Dr. Ying Wan, E-mail: ying\_wan@hust.edu.cn (Y. Wan); Tel: 86-27-87792147; Fax: 86-27-87792234; Dr. Bo Xiao, Tel: 86-23-68254762

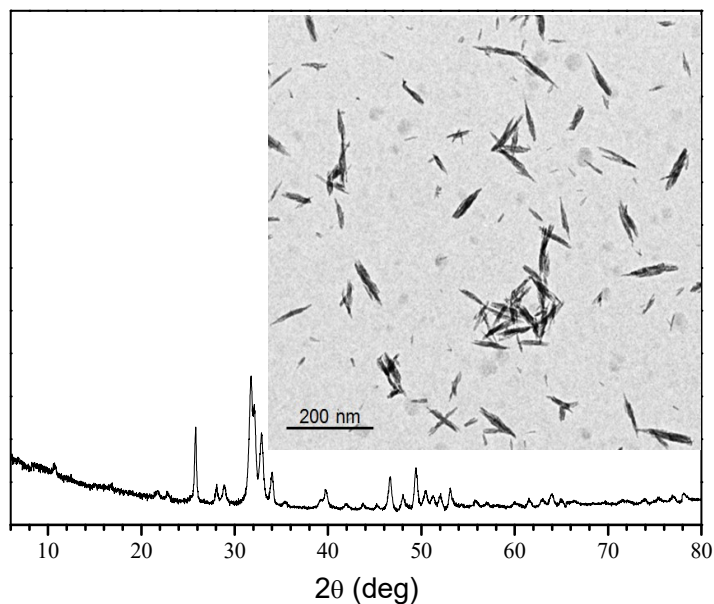

**Figure S1.** Typical XRD pattern and a representative TEM image for hydroxyapatite nanoparticles.

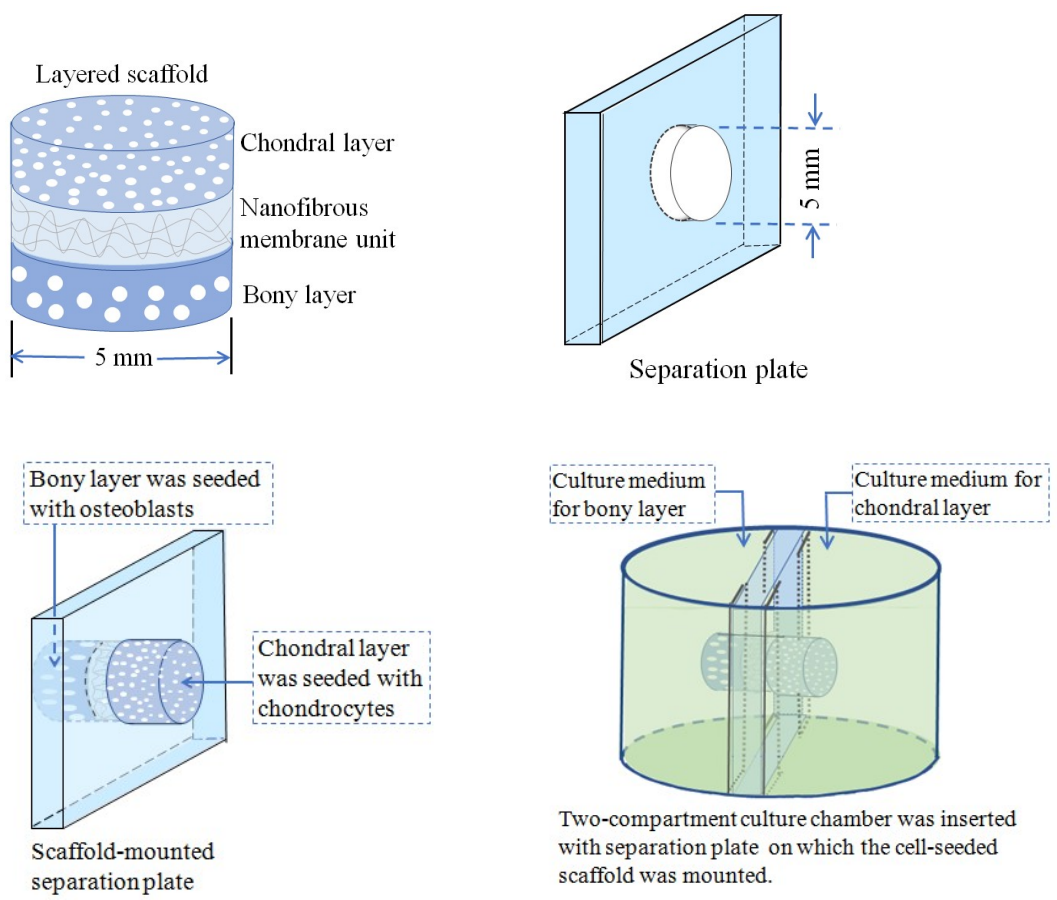

**Figure S2.** Schematic illustration for seeding cells and the followed culture of cell-seeded scaffolds in the two-compartment chamber.

**A**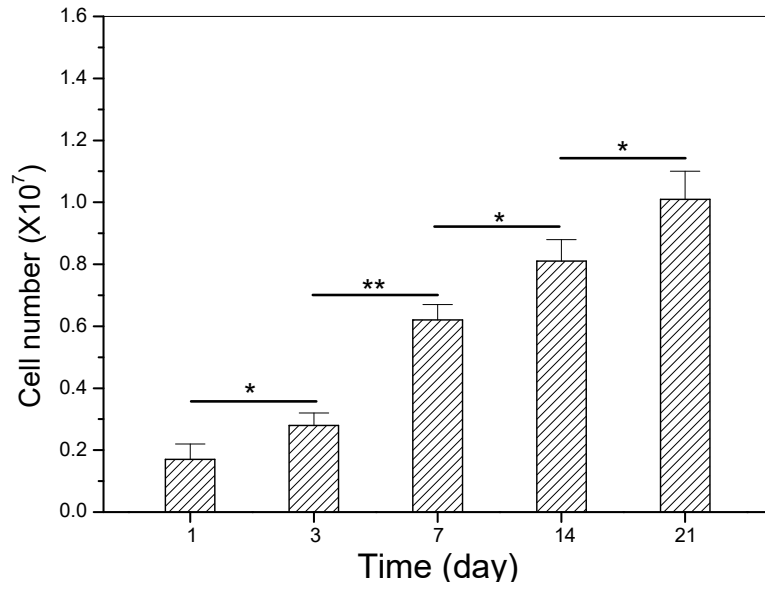**B**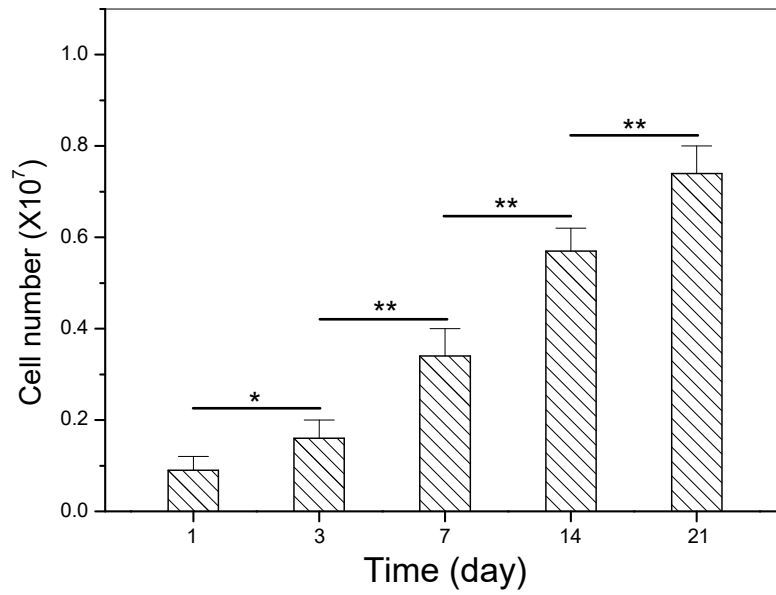

**Figure S3.** Chondrocyte proliferation (A) in chondral layer and osteoblast; proliferation (B) in bony layer of the layered scaffolds (\*,  $p < 0.05$ ; \*\*,  $p < 0.01$ ) .
